# Supplementary material for: CoZnO/C@BCN nanocomposites derived from bimetallic hybrid ZIFs for enhanced electromagnetic wave absorption
Source: Royal Society of Chemistry journal article supplement (doi:10.1039/d3ta03286h), 2023-01-01
Supplement: d3ta03286h1.pdf [file d3ta03286h1.pdf]

## Supporting Information

**CoZnO/C@BCN nanocomposites derived from bimetallic hybrid**

**ZIFs for enhanced electromagnetic wave absorption**

Xuexia Lin<sup>a\*</sup>, Jiafu Hong<sup>a,c</sup>, Chong-Chen Wang<sup>b\*</sup>, Mengxing Su<sup>c</sup>, Shu-Feng Zhou<sup>a</sup>

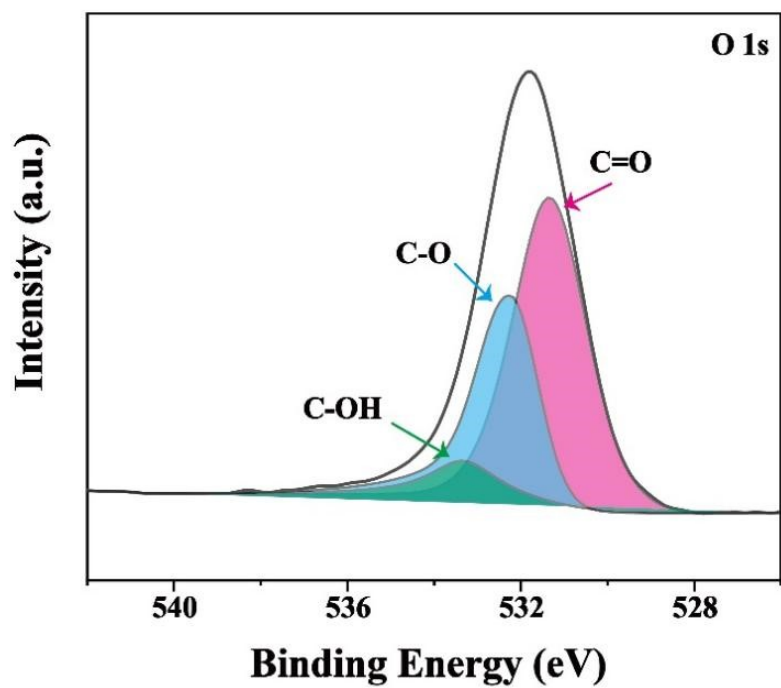

Fig. S1 XPS spectra of O 1s spectrum of Co<sub>1</sub>Zn<sub>1</sub>O/C@BCN

In general, the relative permeability of the conductor is equal to 1 ( $\mu=1$ ), and since the skin depth  $\delta$  is inversely proportional to the square root of the frequency as following<sup>[1, 2]</sup>.

$$\delta = \frac{1}{\sqrt{\pi f \mu \sigma}}$$

where  $\sigma$  is the electrical conductivity,  $\mu$  is the magnetoconductivity,  $f$  is frequency.

The skin depth is large at low frequencies and rapidly decreases as the frequency increases. The variation of skin depth of the nanocomposite with frequency can be obtained by bringing the data into the above formula, as shown in Fig. S2.

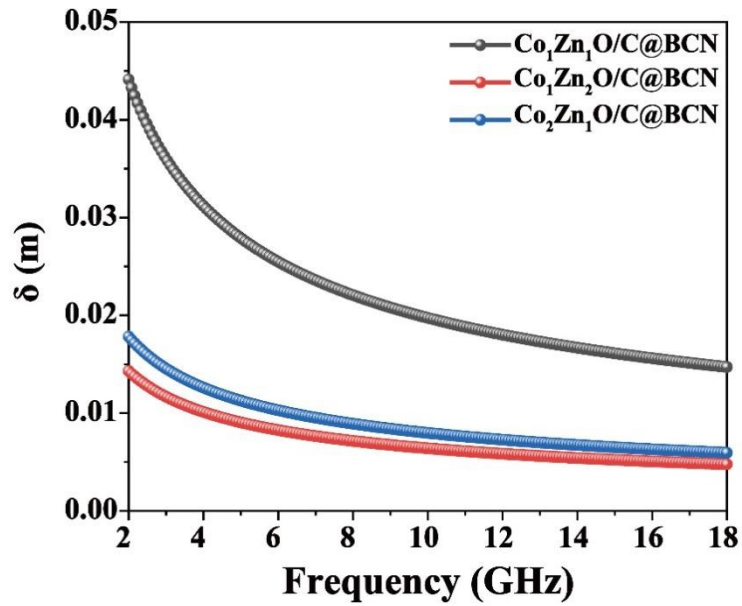

**Fig. S2** The skin-depth of CoZnO/C@BCN nanocomposites varies with frequency

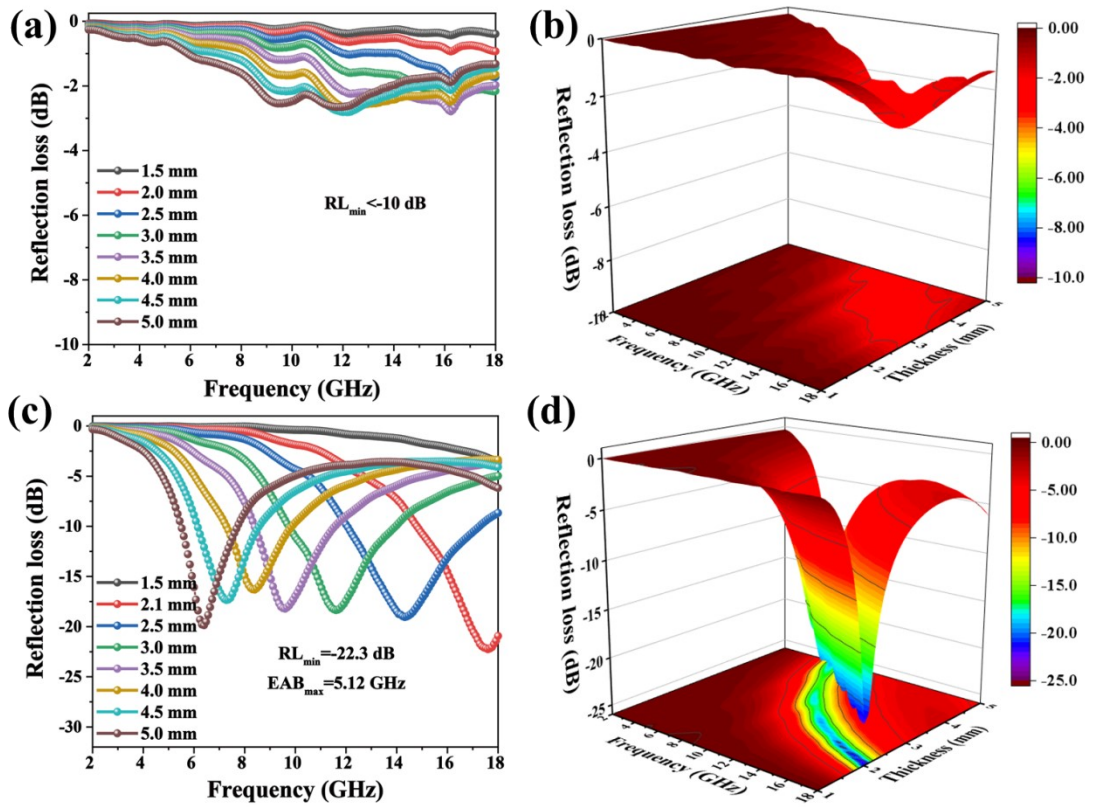

**Fig. S3** Frequency dependence of RL values at different thicknesses for (a, b) ZIF-L(Zn)/BCN, (c, d) ZIF-L(Co)/BCN

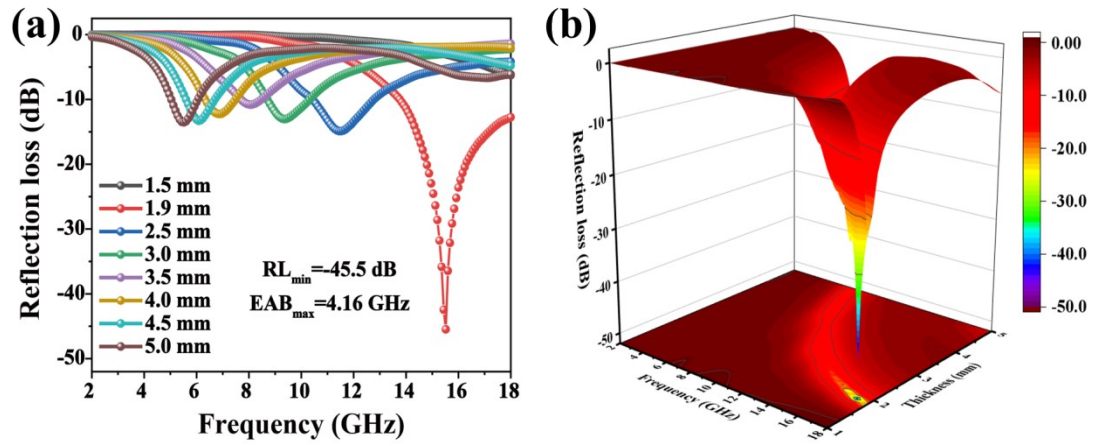

**Fig. S4** Frequency dependence of RL values at different thicknesses for (a, b) ZIF-L(Zn)

## References

1. J. Prasad, A. K. Singh, K. K. Haldar, M. Tomar, V. Gupta and K. Singh, *RSC Advances*, 2019, **9**, 21881-21892.
2. J. Prasad, A. K. Singh, M. Tomar, V. Gupta and K. Singh, *Ceramics International*, 2021, **47**, 15648-15660.
